# Supplementary material for: Careful conversations: an educational video to support parents in communicating about weight with their children
Source: Springer Nature journal article supplement (doi:10.1186/s12887-020-02284-6), 2020-08-24
Supplement: MOESM2 [file 18309504]

# Parent Questionnaire (4-6 Months Post)

Please complete the survey below.

Thank you!

Please do not hesitate to contact us ([michele.strom@sickkids.ca](mailto:michele.strom@sickkids.ca)) if you have any questions or concerns.

Please rate how certain you can do the following tasks right now.

Rate your degree of confidence by recording a number from 0 to 100 using the scale given below:

|                  |    |    |    |    |                   |    |    |    |    |                       |
|------------------|----|----|----|----|-------------------|----|----|----|----|-----------------------|
| 0                | 10 | 20 | 30 | 40 | 50                | 60 | 70 | 80 | 90 | 100                   |
| Cannot do at all |    |    |    |    | Moderately can do |    |    |    |    | Highly certain can do |

1) Raising the issue of weight with your children? 0 50 100

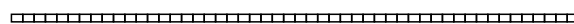

(Place a mark on the scale above)

2) Answering questions/concerns your children may have about their weight? 0 50 100

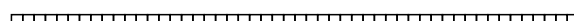

(Place a mark on the scale above)

**Thinking back to the video you watched 4 to 6 months ago (Communicating about weight with your children) please indicate your level of agreement with each statement below by marking a number between 1 (low agreement) and 5 (high agreement).**

|                                                                                          | 1 (Low agreement)     | 2                     | 3                     | 4                     | 5 (High agreement)    |
|------------------------------------------------------------------------------------------|-----------------------|-----------------------|-----------------------|-----------------------|-----------------------|
| 3) The information provided has helped change the way I talk to my children about weight | <input type="radio"/> | <input type="radio"/> | <input type="radio"/> | <input type="radio"/> | <input type="radio"/> |
| 4) I would recommend this video to another parent or caregiver                           | <input type="radio"/> | <input type="radio"/> | <input type="radio"/> | <input type="radio"/> | <input type="radio"/> |

Thank you for participating in our study.

For additional resources you may consult the following links:

1) Centre for Healthy Active Kids:  
<http://www.sickkids.ca/Centre-for-Healthy-Active-Kids/>

2) About Kids Health:  
<http://www.aboutkidshealth.ca/>

Many resources are available at the Hospital for Sick Children:

1) SickKids Team Obesity Management Program (STOMP)  
<http://www.sickkids.ca/STOMP/>

2) Infant and Toddler Growth and Feeding Program  
<http://www.sickkids.ca/PaediaticMedicine/What-we-do/Paediatic-consultation-clinic/index.html>

3) Adolescent Medicine Clinic  
<http://www.sickkids.ca/AdolescentMedicine/>
